# Supplementary figures and images for: Inclusion of Dried Black Soldier Fly Larvae in Free-Range Laying Hen Diets: Effects on Production Efficiency, Feed Safety, Blood Metabolites, and Hen Health
Source: MDPI journal article supplement (doi:10.3390/agriculture14010031), 2023-12-23

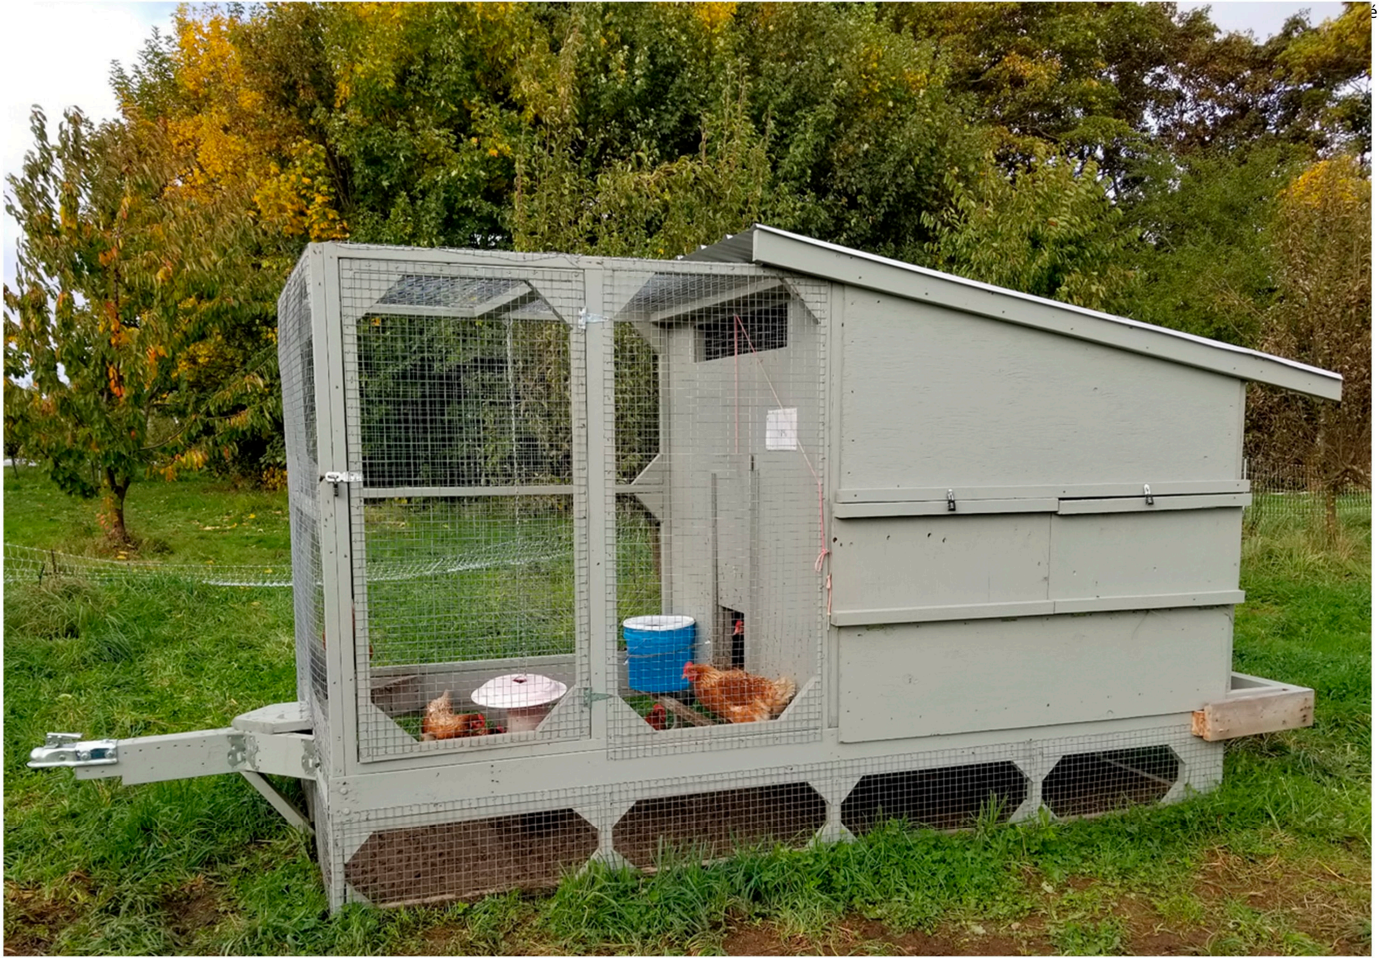

**Figure S1.** A photo of the trailer designed and built for the purposes of this study.

Supplement: s1 [file agriculture-2689370-supplementary.pdf › agriculture-2689370-supplementary.pdf]
